# Supplementary material for: Organotypic stromal cells impact endothelial cell transcriptome in 3D microvessel networks
Source: PubMed Central journal article supplement (PMC9705391; doi:10.1038/s41598-022-24013-y), 2022-11-28
Supplement: 41598_2022_24013_MOESM1_ESM.pdf [file 41598_2022_24013_MOESM1_ESM.pdf]

**SUPPLEMENTARY INFORMATION**

Supplementary figures (Supp Figs 1-11) are provided followed by supplementary tables (Supp Tables 1-9).

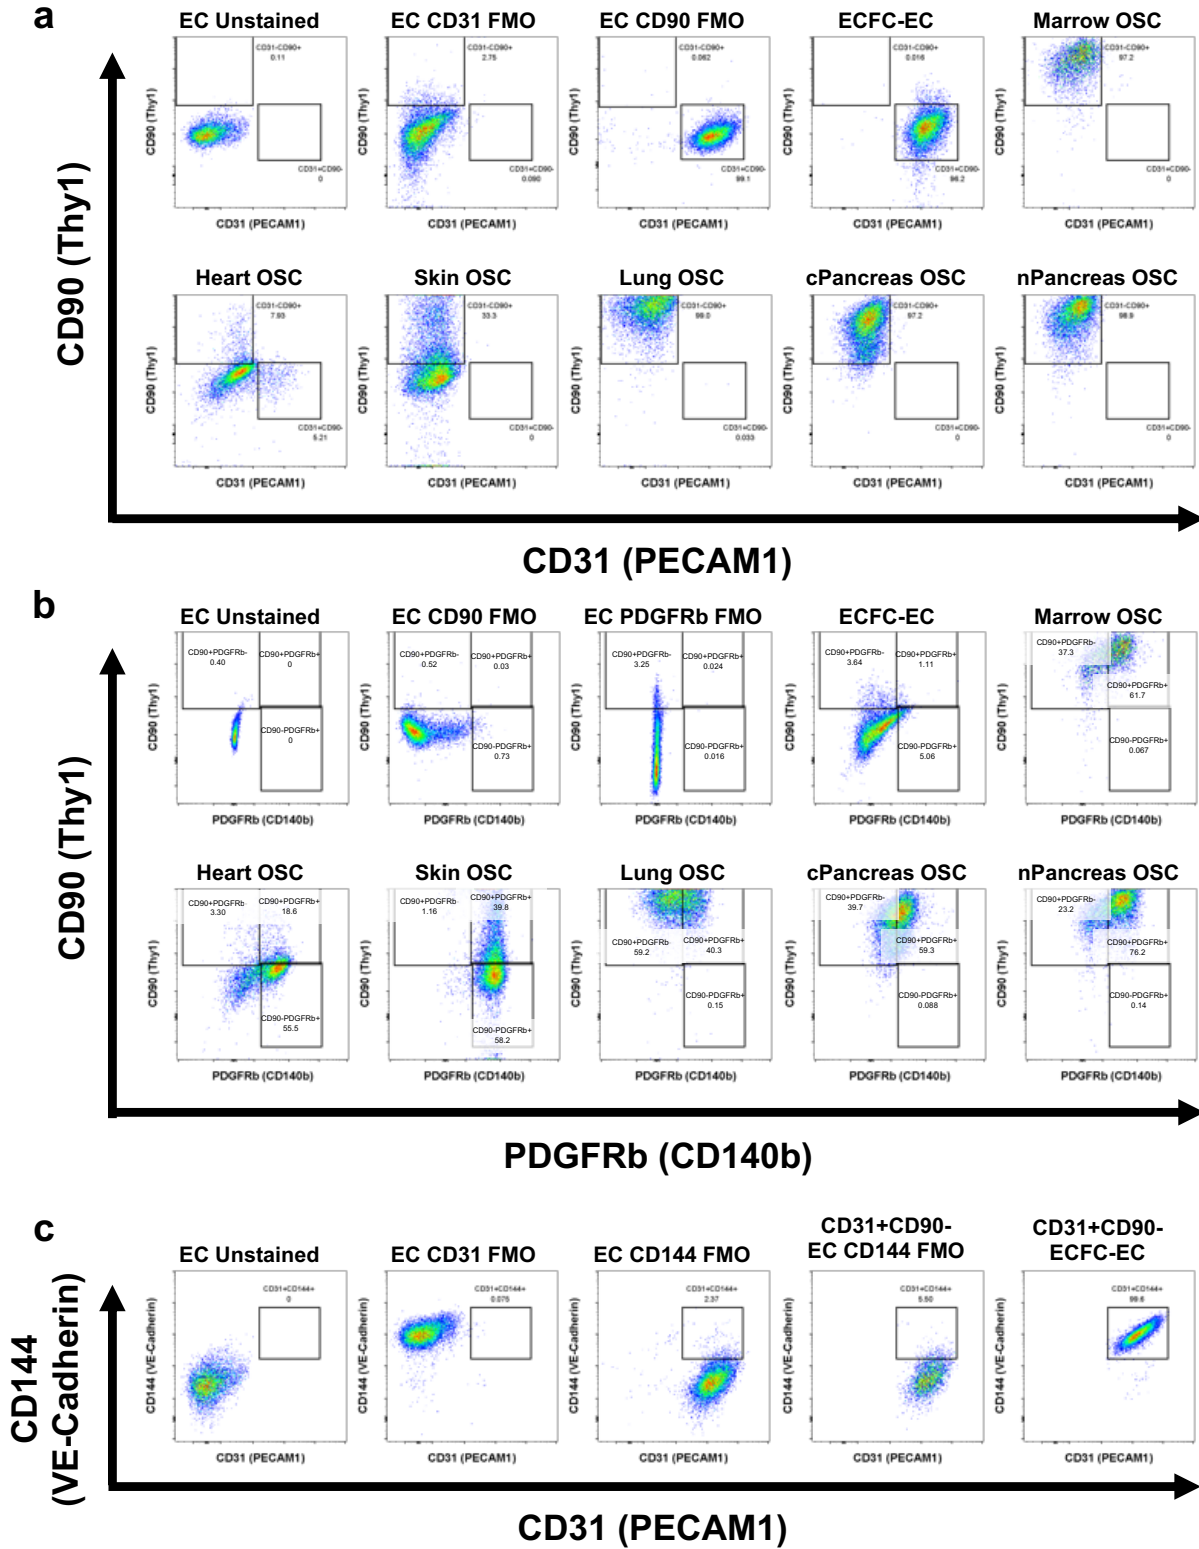

**Supp Fig 1** ECFC-EC monolayers are CD31+CD90-CD144+ by flow cytometry, while OSC monolayers have heterogeneous expression of CD90, but crucially do not express CD31. Additionally, some OSC monolayers also exhibit heterogeneous expression of pericyte marker PDGFRb. **a** CD31 vs. CD90 expression for ECFC-EC and OSC monolayers. Representative plots shown from 3 independent experiments of live, single cells. Average of 20,000 events recorded per cell type. Gating determined by FMO controls on EC monolayers. **b** CD31 vs. PDGFRb expression for ECFC-EC and OSC monolayers. Representative plots shown from 3 independent experiments of live, single cells. Average of 20,000 events recorded. Gating determined by FMO controls on EC monolayers. **c** CD31 vs. CD144 expression for ECFC-EC monolayers. Representative plots shown from 3 independent experiments of live, single cells. Average of 20,000 events recorded per image. Gating determined by FMO controls on ECFC-EC monolayers. CD31/CD144 expression also validated on previously gated CD31+CD90-ECFC-EC monolayers where indicated.

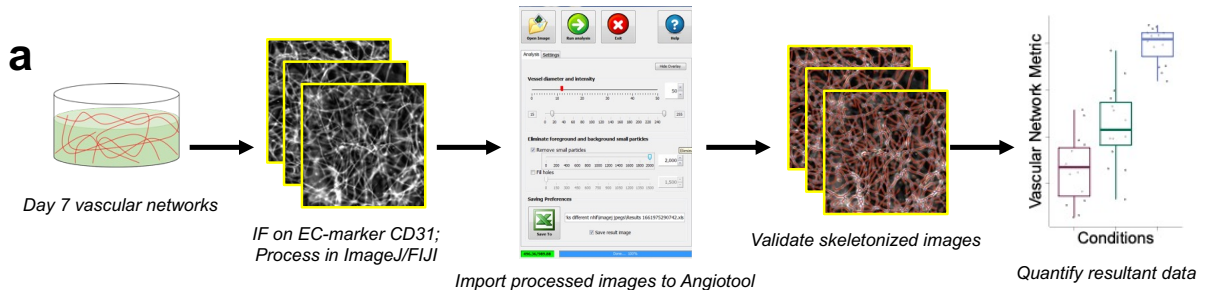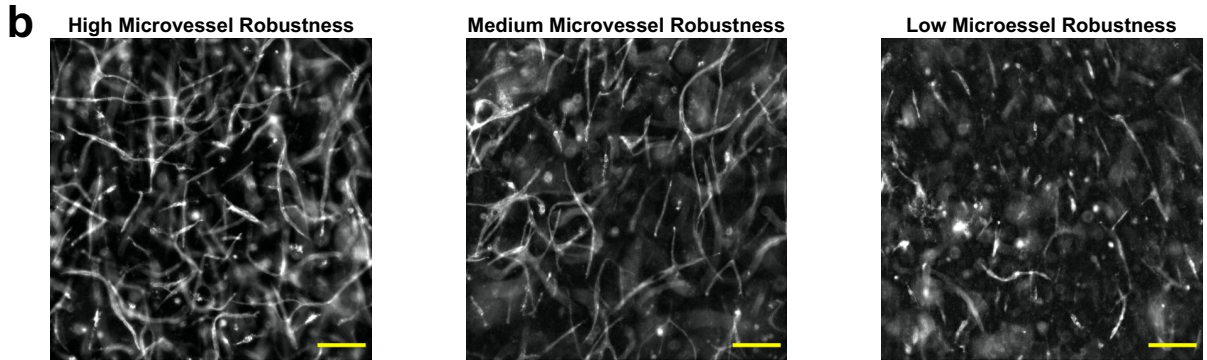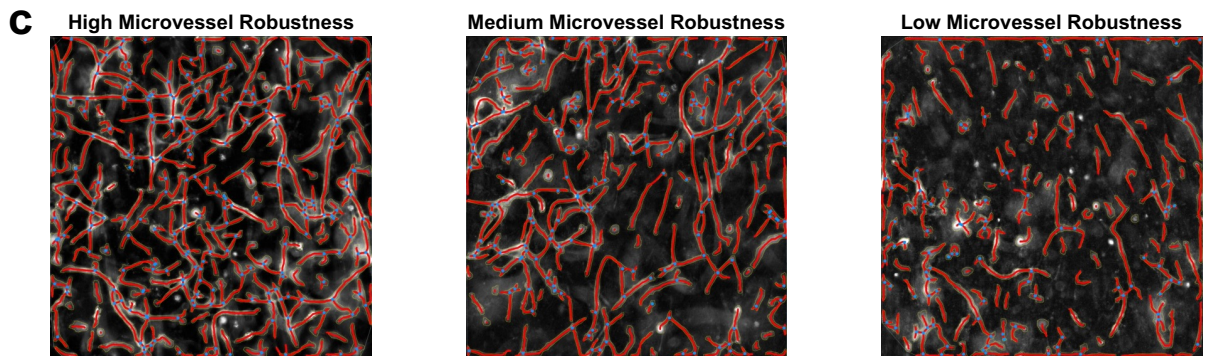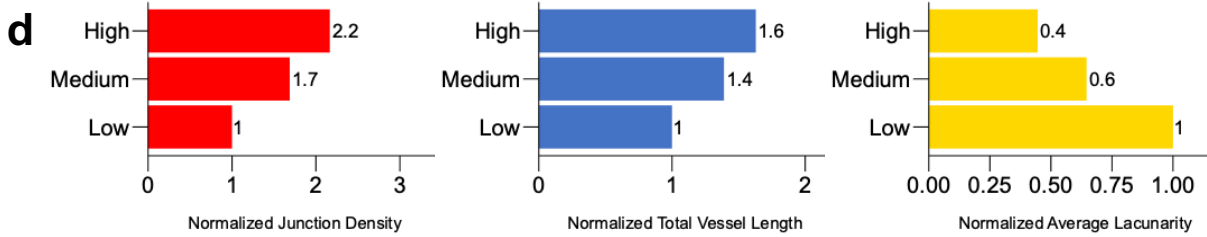

**Supp Fig 2** Workflow for quantification of microvessel networks using Angiotool. **a** Detailed workflow of microvessel network quantification. Day 7 CD31+ microvessel networks undergo IF microscopy, and resultant images are processed using ImageJ. Processed images are then quantified using Angiotool, which yields skeletonized images and allows for statistical comparison of different microvessel network conditions. **b** Day 7 CD31+ microvessel networks from 3D *in vitro* fibrin hydrogels utilized in this study exhibit qualitative differences in vessel robustness. Scale bar represents 200  $\mu\text{m}$ . Each image represents an independent biological replicate ( $n = 1$  per vessel density condition). **c** Skeletonized images of the different 3D *in vitro* microvessel networks allows for the quantification of differences between 3D *in vitro* microvessel networks. **d** Resultant quantification of microvessel networks. Junction density, total vessel length, and average lacunarity values normalized by the “Low Microvessel Robustness” condition.

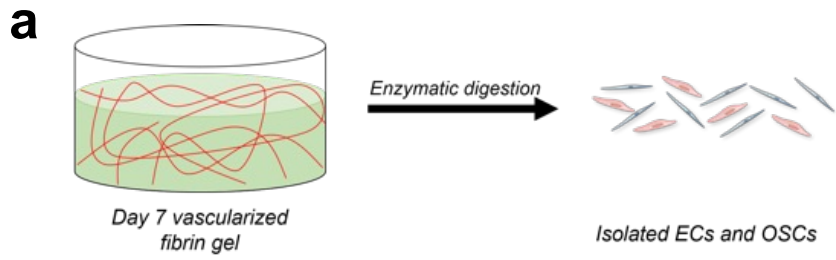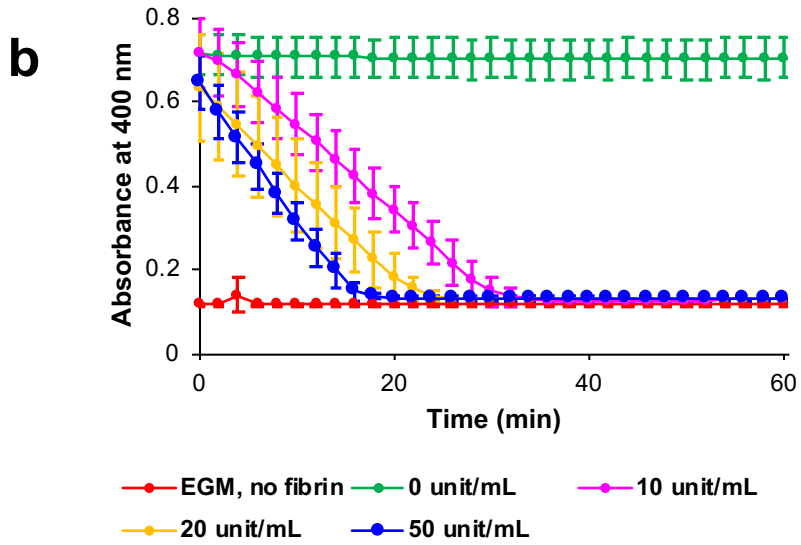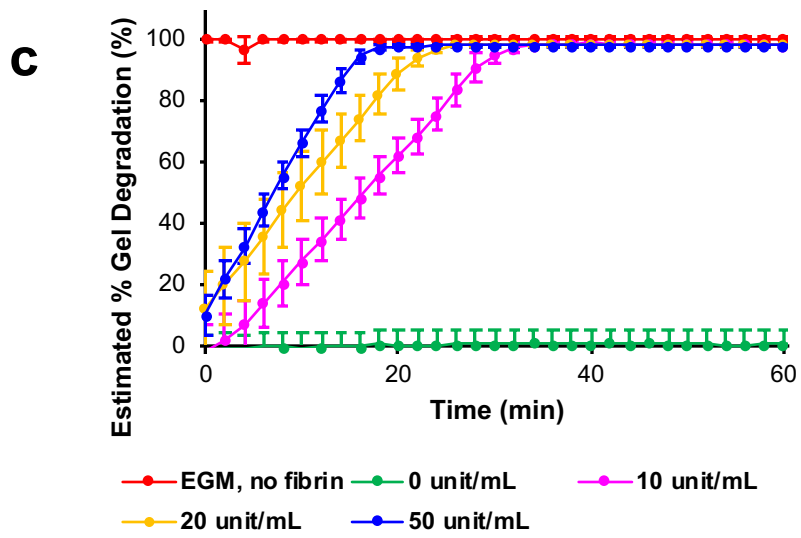

**Supp Fig 3** 3D fibrin hydrogels can be degraded by leveraging fibrinolytic activity of nattokinase. **a** Schematic detailing enzymatic digestion of 3D *in vitro* fibrin hydrogels containing Day 7 microvessel networks consisting of ECs and OSCs. **b** Absorbance values at 400 nm for 150  $\mu$ L 3D *in vitro* blank hydrogels (fibrin only, no cells) exposed to a variety of concentrations of nattokinase diluted in EGM-2 over the course of 2 hours. Error bars represent 1 standard deviation around the mean absorbance value. Sample size of 3 for each measurement. **c** Estimated percent gel degradation for 150  $\mu$ L 3D *in vitro* blank hydrogels based on normalization of absorbance values from Supp. Fig. 2B.

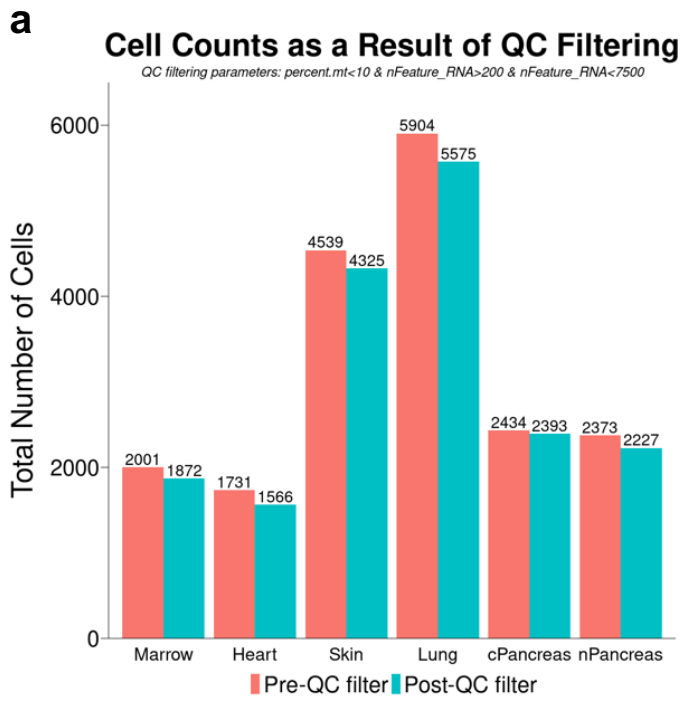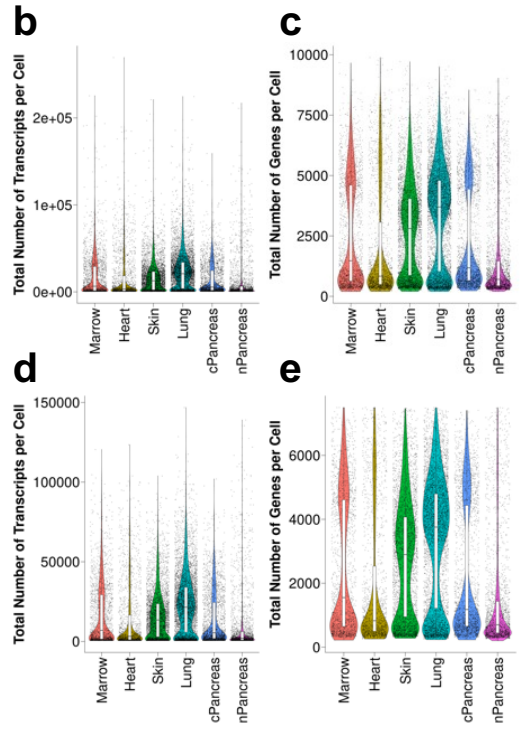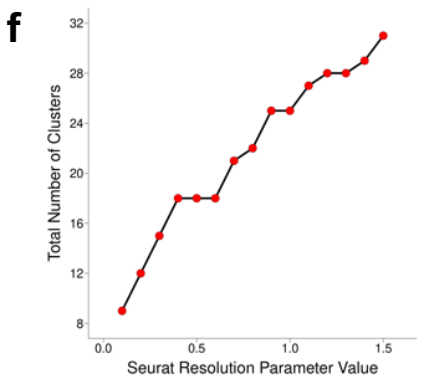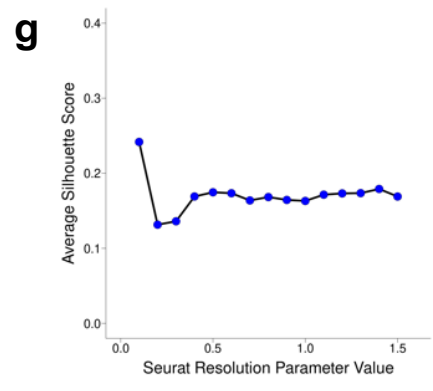



**Supp Fig 4** Quality control of complete 3D *in vitro* microvessel network scRNA-Seq dataset, along with validation of clustering. **a** Bar chart indicating number of cells isolated from each 3D *in vitro* microvessel network condition before and after QC filtering as part of the scRNA-Seq analysis. **b** Violin plot of total number of transcripts for each microvessel network sample before QC filtering. **c** Violin plot of total number of unique genes for each sample before QC filtering. **d** Violin plot of total number of transcripts for each sample after QC filtering. **e** Violin plot of total number of unique genes for each sample after QC filtering. **f** Scatterplot of resultant number of cell clusters to Seurat resolution parameter value (values between 0.1-1.5). **g** Scatterplot of average silhouette score for clusters as determined by Seurat resolution parameter (values between 0.1-1.5).

**a** **ENDOTHELIAL**

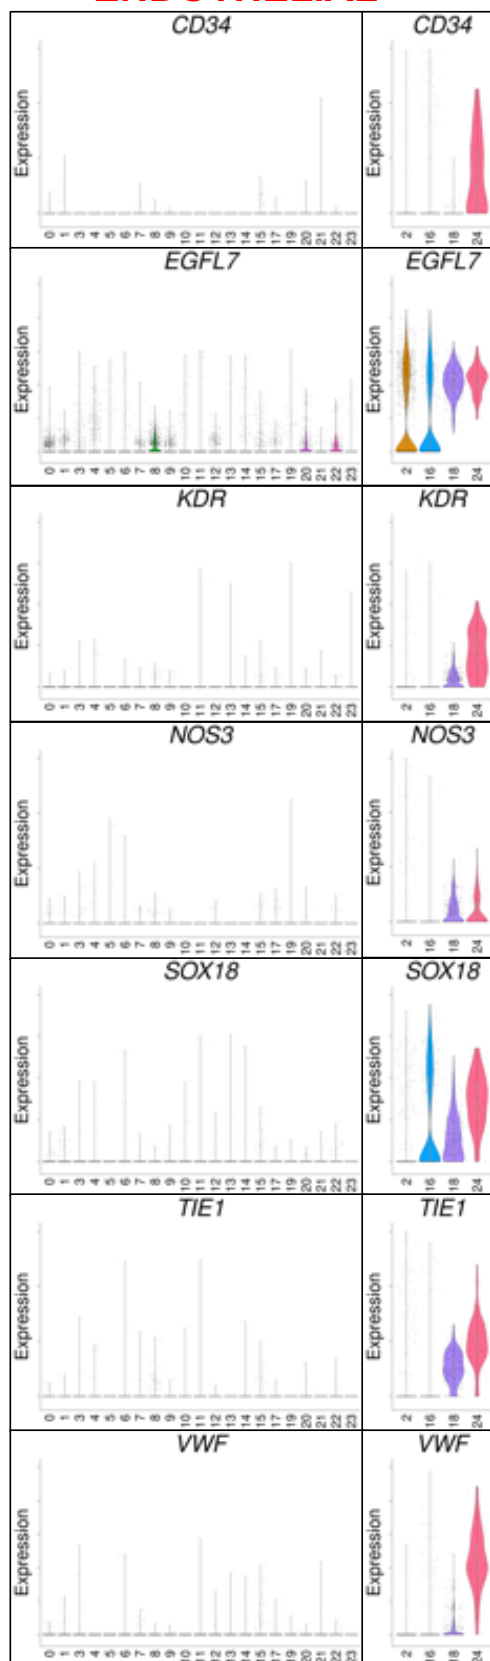

**b** **STROMAL**

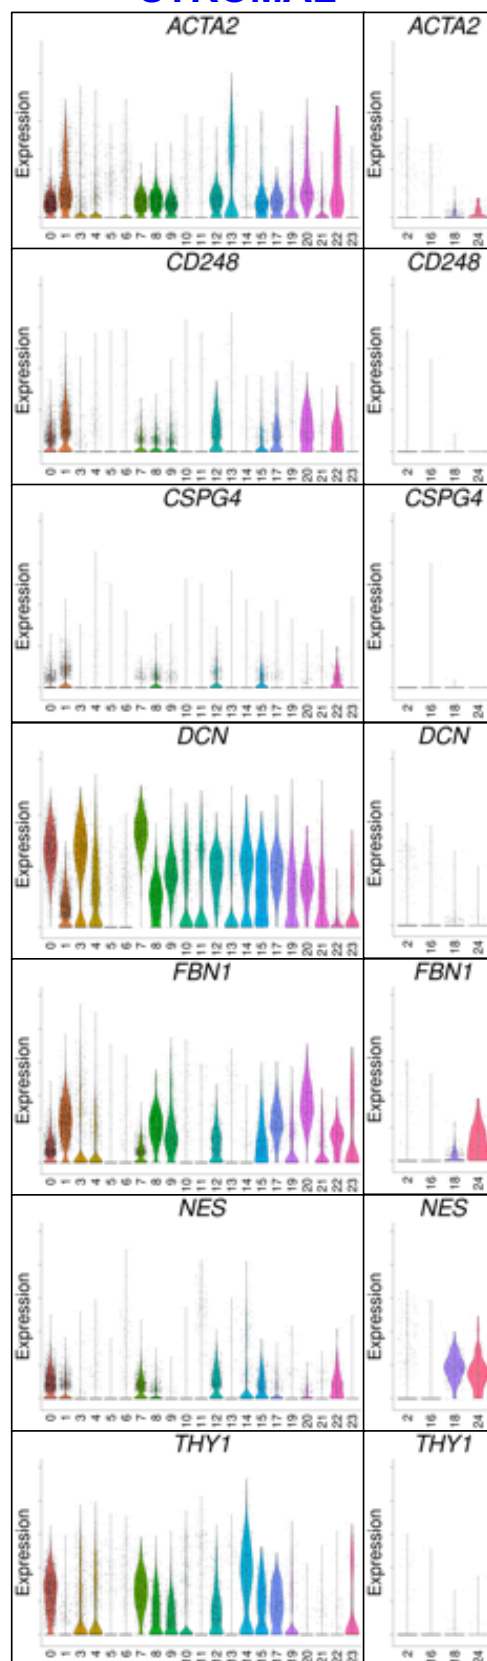

**Supp Fig 5** Additional characteristic EC and OSC gene expression of clusters from 3D *in vitro* microvessel network dataset. **a** Violin plots of additional EC-characteristic genes *CD34*, *EGFL7*, *KDR*, *NOS3*, *SOX18*, *TIE1*, and *VWF* for each cluster identified in complete 3D *in vitro* microvessel network dataset. **b** Violin plots of additional stroma-characteristic genes *ACTA2*, *CD248*, *CSPG4*, *DCN*, *FBN1*, *NES*, and *THY1* for each cluster identified in complete 3D *in vitro* microvessel network dataset.

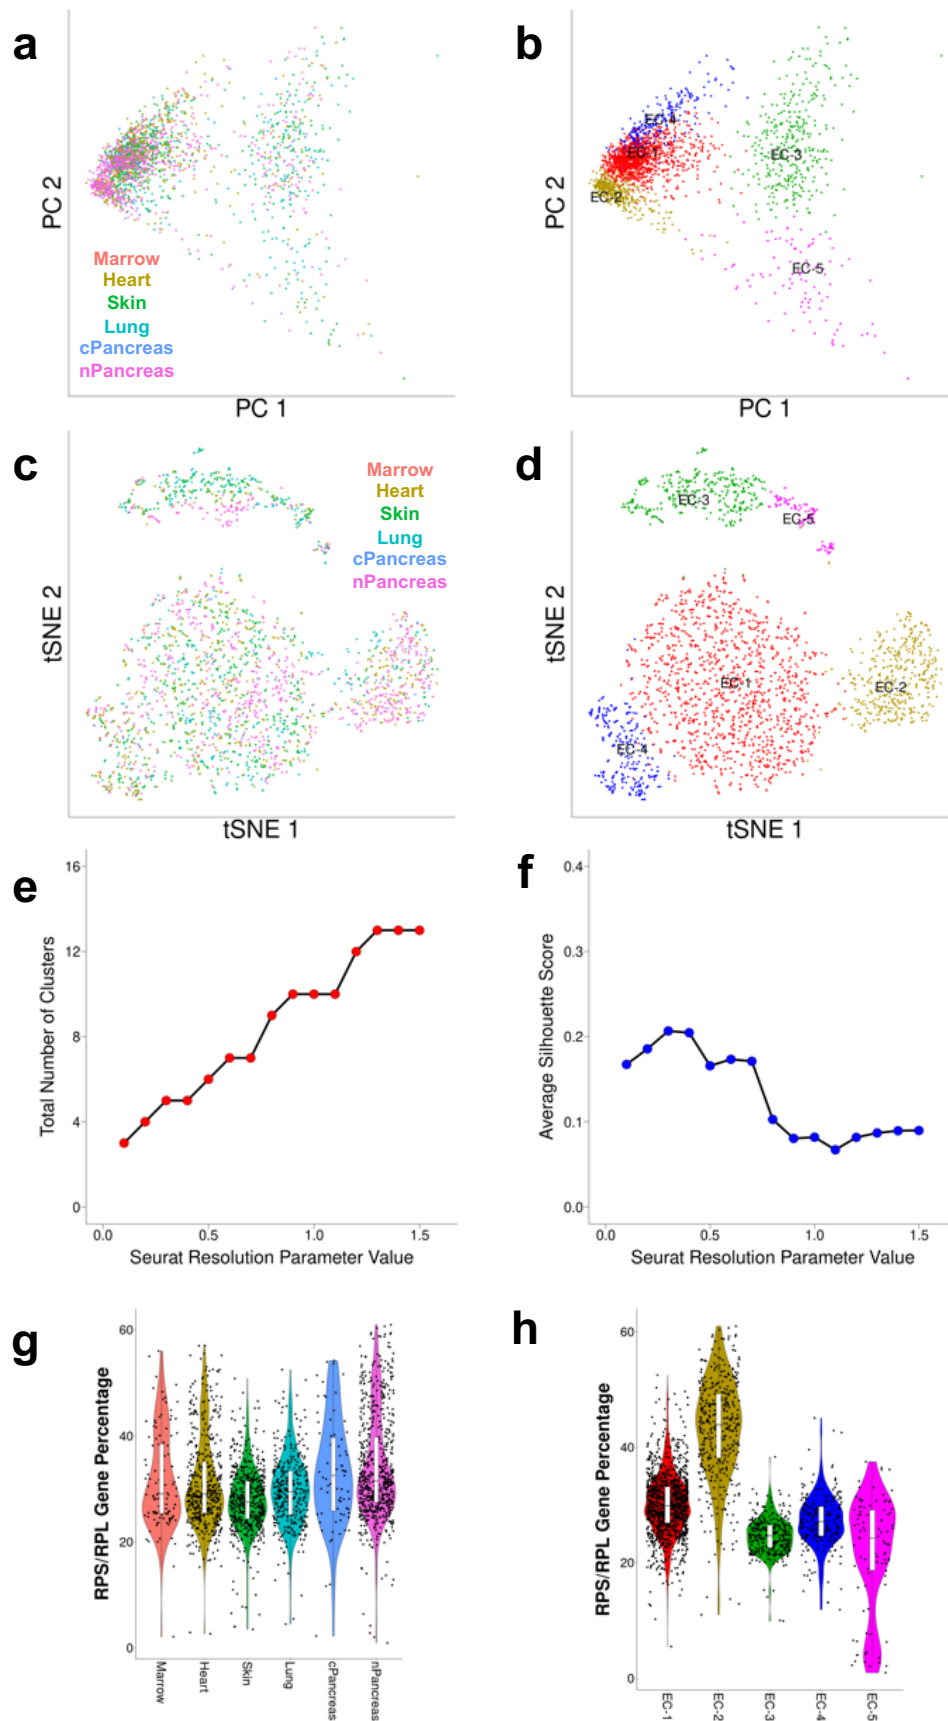

**Supp Fig 6** Dimensionality reduction and analysis of clustering results of re-normalized and re-clustered ECs isolated from 3D *in vitro* microvessel network dataset. **a** PCA plot of EC dataset separated by microvessel network type (Marrow, Heart, Skin, Lung, cPancreas, nPancreas). **b** PCA plot of EC dataset separated by cluster identity (EC-1, EC-2, EC-3, EC-4, EC-5). **c** tSNE plot of EC dataset separated by microvessel network type. **d** tSNE plot of EC dataset separated by cluster identity. **e** Scatterplot of resultant number of cell clusters to Seurat resolution parameter value (values between 0.1-1.5). **f** Scatterplot of average silhouette score for clusters as determined by Seurat resolution parameter (values between 0.1-1.5). **g** Violin plot of percentage of ribosomal genes (percentage of gene expression by *RPS* and *RPL* genes per cell) grouped by microvessel network type. **h** Violin plot of percentage of ribosomal genes (percentage of gene expression by *RPS* and *RPL* genes per cell) grouped by EC cluster identity.

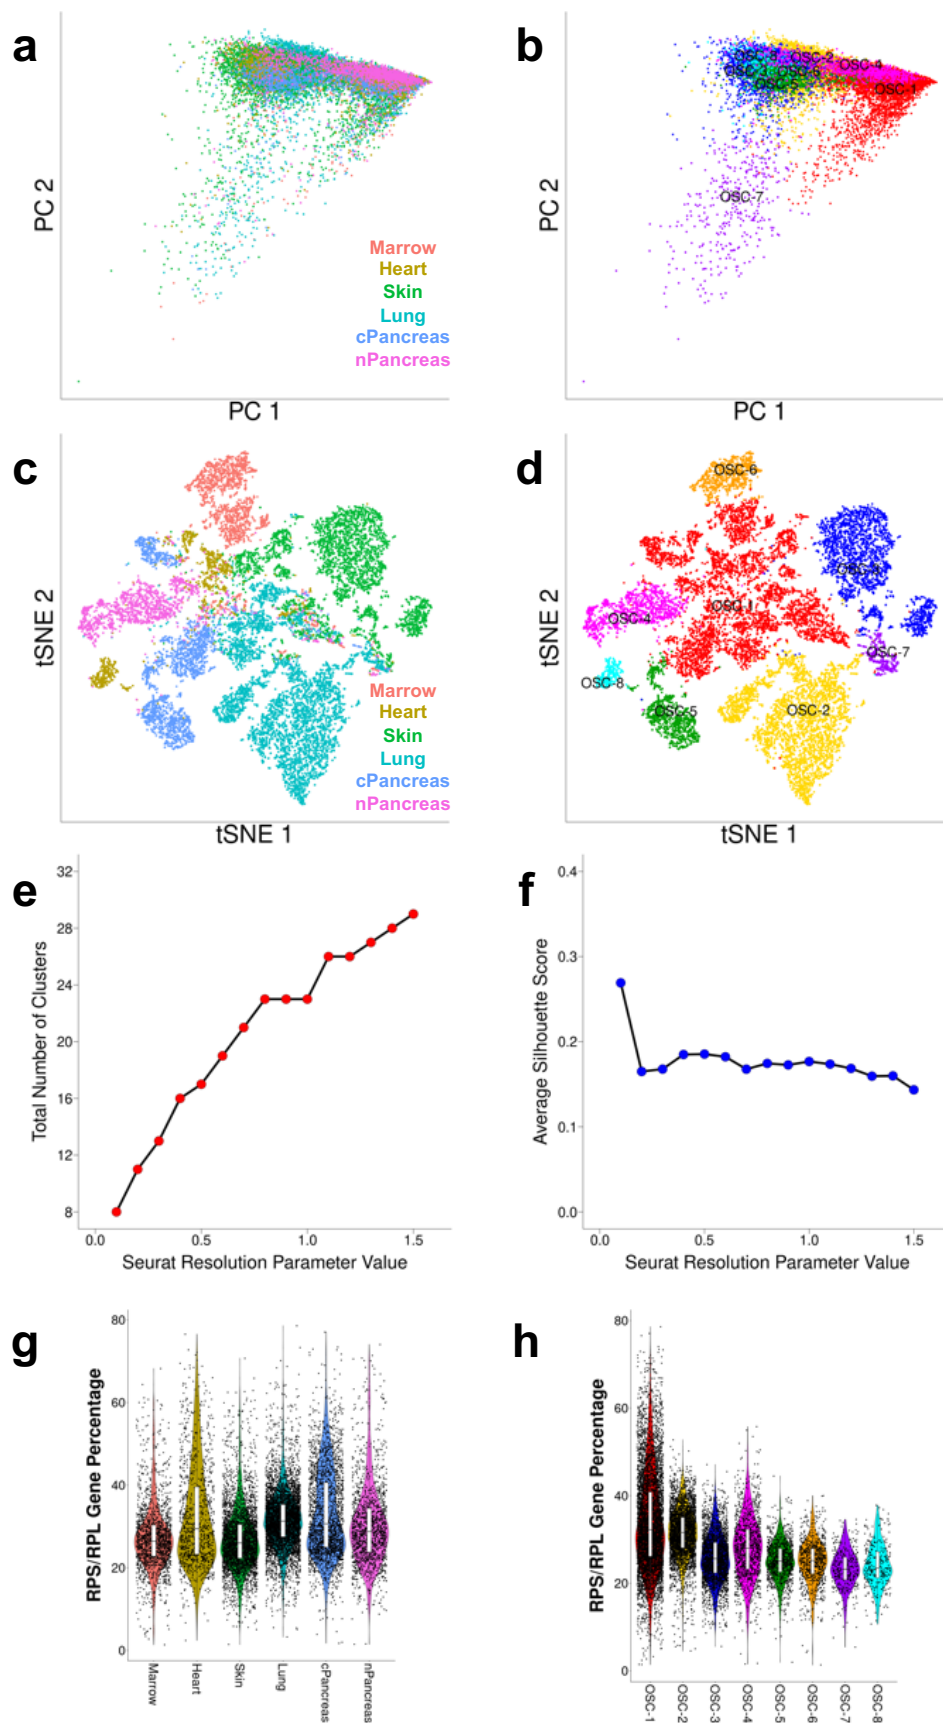

**Supp Fig 7** Dimensionality reduction and analysis of clustering results of re-normalized and re-clustered OSCs isolated from 3D *in vitro* microvessel network dataset. **a** PCA plot of OSC dataset separated by microvessel network type (Marrow, Heart, Skin, Lung, cPancreas, nPancreas). **b** PCA plot of OSC dataset separated by cluster identity (OSC-1, OSC-2, OSC-3, OSC-4, OSC-5, OSC-6, OSC-7, OSC-8). **c** tSNE plot of OSC dataset separated by microvessel network type. **d** tSNE plot of OSC dataset separated by cluster identity. **e** Scatterplot of resultant number of cell clusters to Seurat resolution parameter value (values between 0.1-1.5). **f** Scatterplot of average silhouette score for clusters as determined by Seurat resolution parameter (values between 0.1-1.5). **g** Violin plot of percentage of ribosomal genes (percentage of gene expression by *RPS* and *RPL* genes per cell) grouped by microvessel network type. **h** Violin plot of percentage of ribosomal genes (percentage of gene expression by *RPS* and *RPL* genes per cell) grouped by OSC cluster identity.

**a**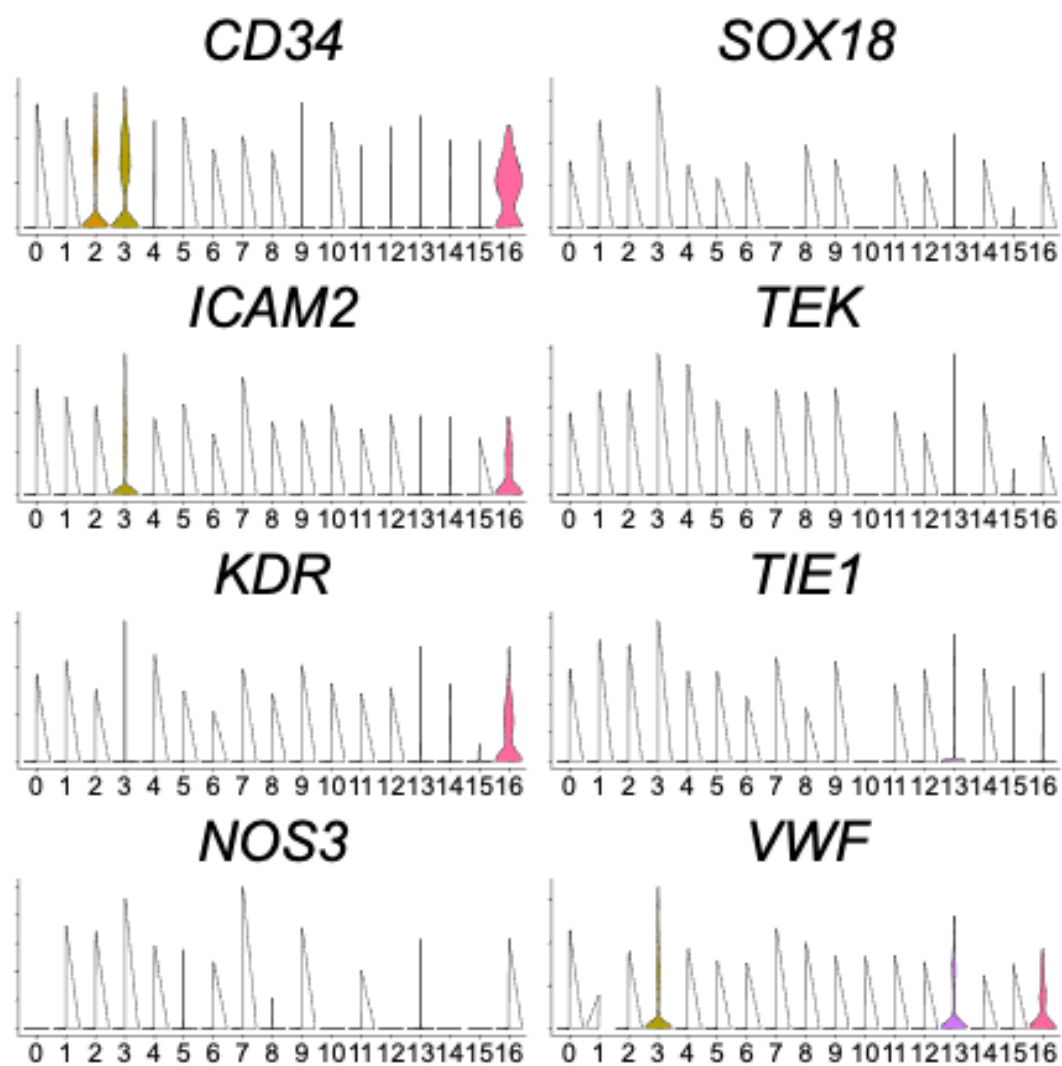**b**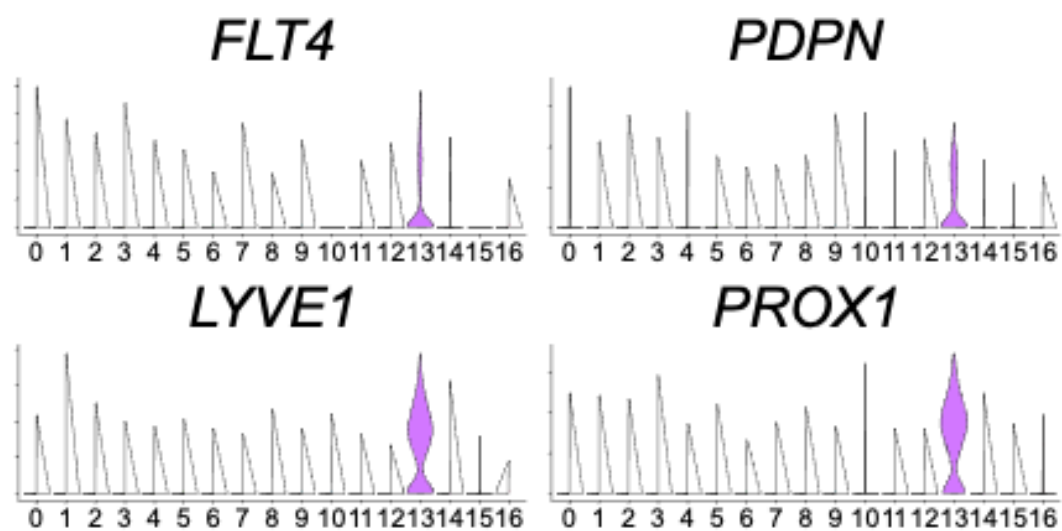



**Supp Fig 8** Additional violin plots of EC-related genes from clusters identified in skin *in vivo* dataset (data from Solé-Boldo, *et al.*) identifies a population of lymphatic ECs to be excluded from downstream analysis [2]. **a** Violin plots of EC-related genes *CD34*, *ICAM2*, *KDR*, *NOS3*, *SOX18*, *TEK*, *TIE1*, and *VWF*. **b** Violin plots of lymphatic EC-related genes *FLT4*, *LYVE1*, *PDPN*, and *PROX1*.

a

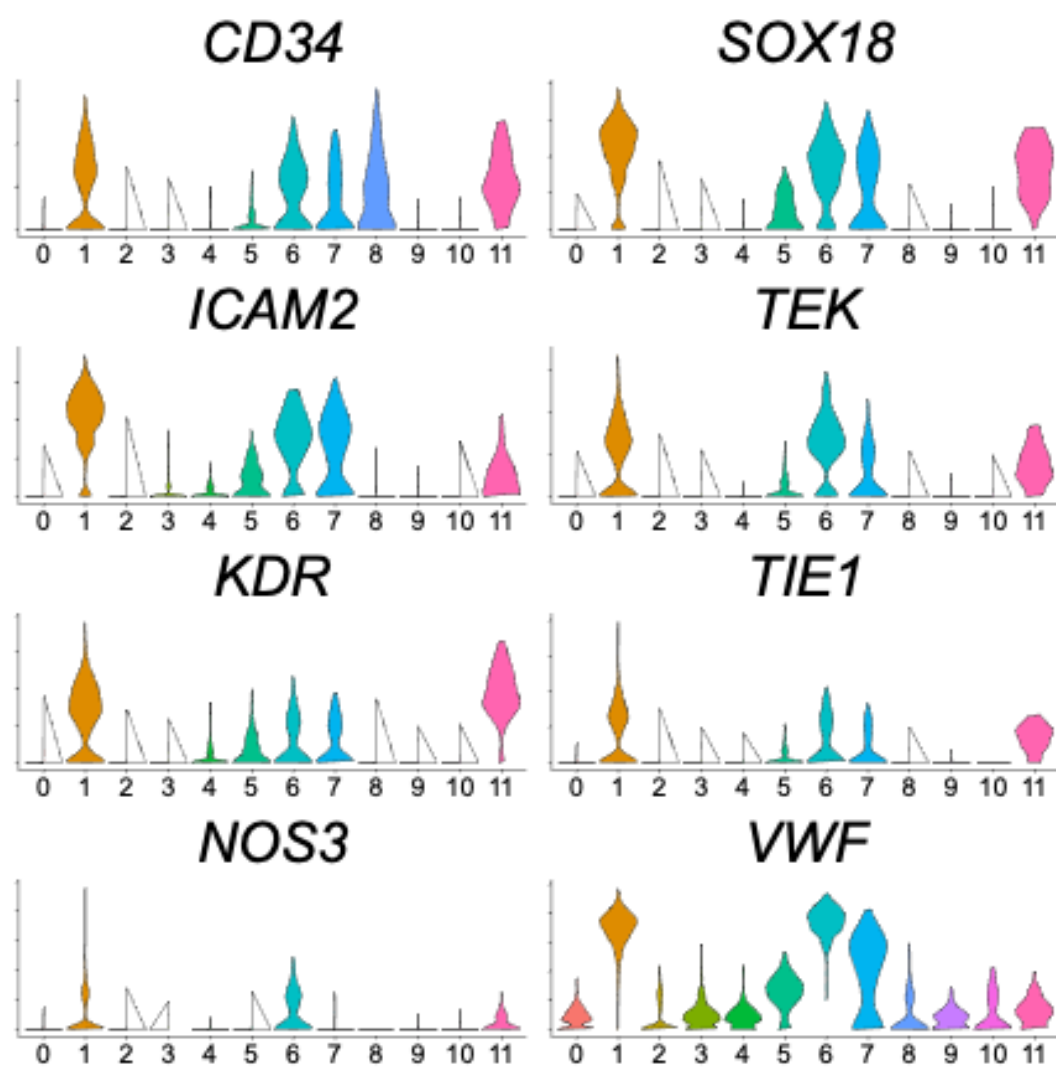

b

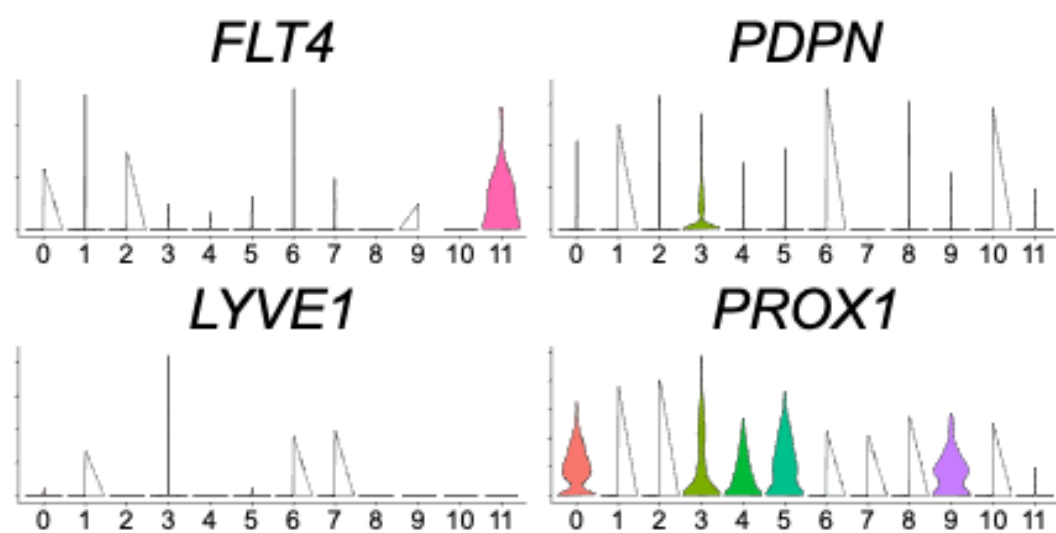

**Supp Fig 9** Additional violin plots of EC-related genes from clusters identified in heart *in vivo* dataset (data from Tabula Sapiens, *et al.*) [1]. **A** Violin plots of EC-related genes *CD34*, *ICAM2*, *KDR*, *NOS3*, *SOX18*, *TEK*, *TIE1*, and *VWF*. **B** Violin plots of lymphatic EC-related genes *FLT4*, *LYVE1*, *PDPN*, and *PROX1*.

**a**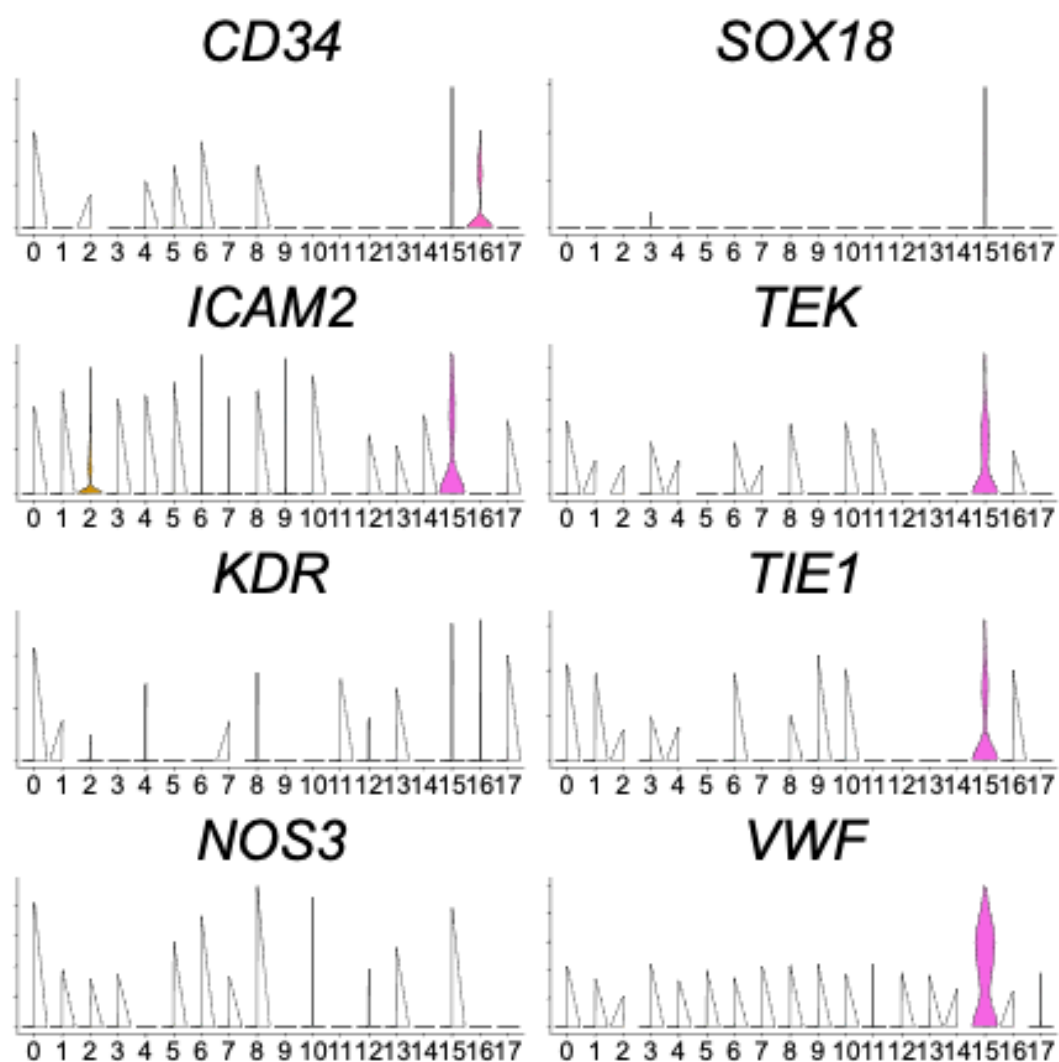**b**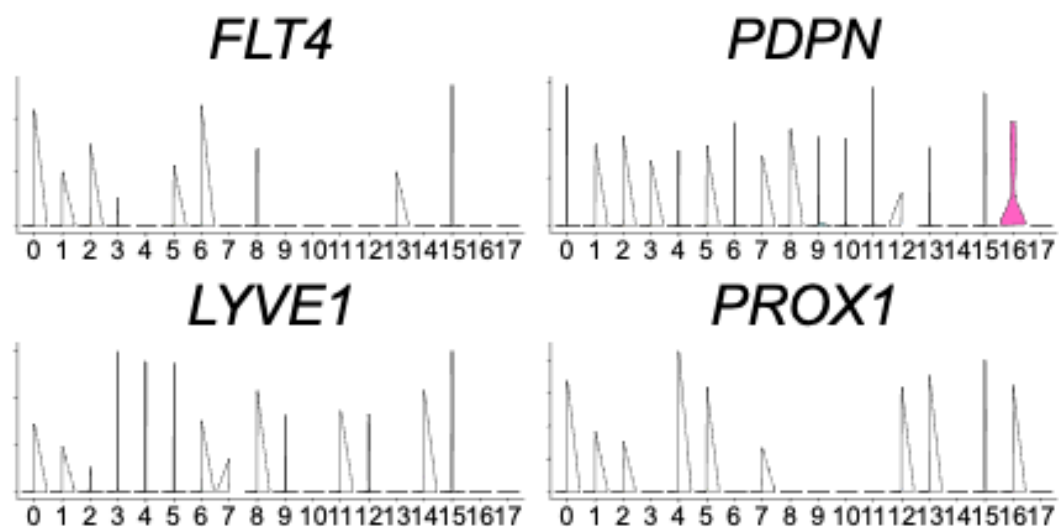

**Supp Fig 10** Additional violin plots of EC-related genes from clusters identified in lung *in vivo* dataset (data from Schupp, *et al*) [3]. **A** Violin plots of EC-related genes *CD34*, *ICAM2*, *KDR*, *NOS3*, *SOX18*, *TEK*, *TIE1*, and *VWF*. **B** Violin plots of lymphatic EC-related genes *FLT4*, *LYVE1*, *PDPN*, and *PROX1*.

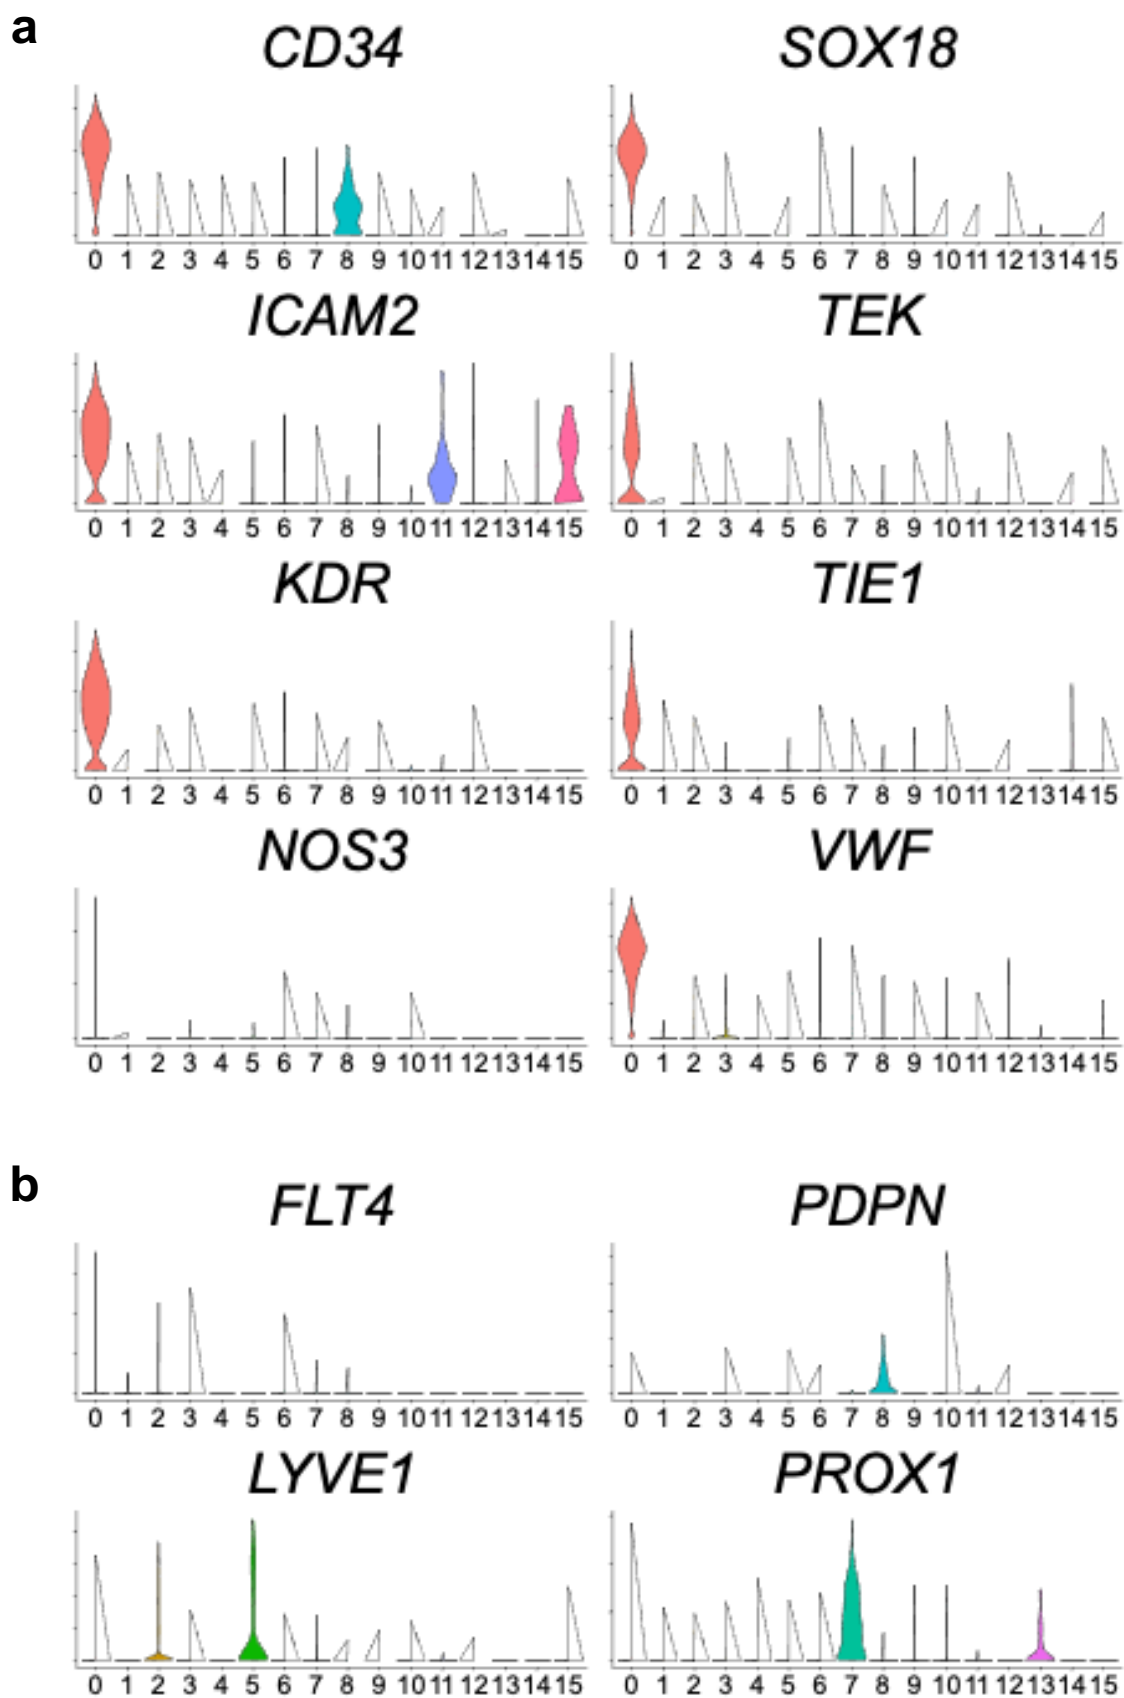

**Supp Fig 11** Additional violin plots of EC-related genes from clusters identified in normal pancreas *in vivo* dataset (data from Tabula Sapiens, *et al.*) [1]. **A** Violin plots of EC-related genes *CD34*, *ICAM2*, *KDR*, *NOS3*, *SOX18*, *TEK*, *TIE1*, and *VWF*. **B** Violin plots of lymphatic EC-related genes *FLT4*, *LYVE1*, *PDPN*, and *PROX1*.

| Vendor         | Cat #  | Fluorophore     | Target                    | Vol. per 100 $\mu$ L Test ( $\mu$ L) |
|----------------|--------|-----------------|---------------------------|--------------------------------------|
| BD Biosciences | 560411 | FITC            | CD144/<br>VE-Cadherin     | 20                                   |
| BioLegend      | 303116 | APC             | CD31/<br>PECAM1           | 5                                    |
| BioLegend      | 328122 | BV 421          | CD90/<br>THY1             | 5                                    |
| BioLegend      | 323606 | PE              | PDGFR $\beta$ /<br>CD140b | 5                                    |
| ThermoFisher   | L10119 | Fixable Near IR | Live/Dead                 | 1                                    |

**Supp Table 1** Antibodies used in the flow cytometry characterization of cell monolayers prior to 3D fibrin hydrogel culture from Supp. Fig. 1.



| Vendor       | Cat #    | Species | Target          | Fluorophore     | Dilution |
|--------------|----------|---------|-----------------|-----------------|----------|
| ThermoFisher | 13031982 | Mouse   | CD31/<br>PECAM1 | N/A             | 1:100    |
| ThermoFisher | A21427   | Rabbit  | Anti-Mouse      | Alexa Fluor 555 | 1:400    |

**Supp Table 2** Antibodies used in the immunofluorescent characterization of microvessel networks from 3D *in vitro* fibrin hydrogels from Fig. 1.

| Name                 | Environment | Version |
|----------------------|-------------|---------|
| Ubuntu               | Linux       | 20.04.4 |
| CellRanger           | Linux       | 5.0.0   |
| GRCh38               | Linux       | 3.0.0   |
| base                 | R           | 4.0.3   |
| Matrix               | R           | 1.4-1   |
| org.HS.eg.db         | R           | 3.12.0  |
| topGO                | R           | 2.42.0  |
| SparseM              | R           | 1.81    |
| GO.db                | R           | 3.12.1  |
| circlize             | R           | 0.4.14  |
| AnnotationDbi        | R           | 1.52.0  |
| graph                | R           | 1.68.0  |
| stringr              | R           | 1.4.0   |
| SeuratWrappers       | R           | 0.3.0   |
| monocle3             | R           | 1.0.0   |
| SingleCellExperiment | R           | 1.12.0  |
| SummarizedExperiment | R           | 1.20.0  |
| GenomicRanges        | R           | 1.42.0  |
| GenomeInfoDb         | R           | 1.26.7  |
| IRanges              | R           | 2.24.1  |
| S4Vectors            | R           | 0.28.1  |
| MatrixGenerics       | R           | 1.2.1   |
| matrixStats          | R           | 0.61.0  |
| NMF                  | R           | 0.24.0  |
| cluster              | R           | 2.1.3   |
| rngtools             | R           | 1.5.2   |
| pkgmaker             | R           | 0.32.2  |
| registry             | R           | 0.5-1   |
| CellChat             | R           | 1.1.3   |
| Biobase              | R           | 2.50.0  |
| BiocGenerics         | R           | 0.36.1  |
| igraph               | R           | 1.3.0   |
| cowplot              | R           | 1.1.1   |
| ggplot2              | R           | 3.3.5   |
| patchwork            | R           | 1.1.1   |
| dplyr                | R           | 1.0.8   |
| SeuratObject         | R           | 4.0.4   |
| Seurat               | R           | 4.1.0   |
| svglite              | R           | 2.1.0   |
| forcats              | R           | 0.5.1   |

**Supp Table 3** System version information for Linux command line and relevant packages from R computing environment.

| #  | EC-1     | EC-2     | EC-3    | EC-4      | EC-5       |
|----|----------|----------|---------|-----------|------------|
| 1  | MT2A     | RGCC     | NEAT1   | HIST1H1B  | MALAT1     |
| 2  | MT1E     | IL32     | MT-CO2  | HIST1H4C  | NEAT1      |
| 3  | TXN      | LXN      | HSPA5   | UBE2C     | VWF        |
| 4  | SERPINE1 | CDC42EP5 | APLP2   | HIST1H2AG | COL4A1     |
| 5  | SH3BGRL3 | SOX18    | MT-CYB  | HIST1H1C  | HSPG2      |
| 6  | RPL22L1  | PGF      | THBS1   | HIST1H1D  | COL4A2     |
| 7  | BOLA3    | TMSB4X   | HSP90B1 | CKS2      | TCIM       |
| 8  | HMGA1    | TPT1     | MT-ATP6 | HMGB2     | COL18A1    |
| 9  | S100A6   | RPS27    | MALAT1  | HIST1H3B  | DEPP1      |
| 10 | ANXA2    | BTG1     | CTGF    | HIST1H1E  | XIST       |
| 11 | POLR2E   | PNRC1    | CYR61   | HIST2H2AC | PECAM1     |
| 12 | PRDX1    | GNG11    | AHNAK   | CDK1      | ARGLU1     |
| 13 | GSTP1    | RPL10    | EDN1    | CCNB1     | CLDN5      |
| 14 | PFN1     | C12orf57 | MT-CO3  | TOP2A     | WSB1       |
| 15 | FKBP11   | CALM1    | HHIP    | TPX2      | TCF4       |
| 16 | ADIRF    | NOP53    | MT-CO1  | KPNA2     | RHOB       |
| 17 | LDHA     | RPL28    | ITGB1   | NUSAP1    | UACA       |
| 18 | PSMD2    | RPS28    | PTX3    | TUBB4B    | PXDN       |
| 19 | PPIA     | RPL13    | CRIM1   | RRM2      | MACF1      |
| 20 | OAZ1     | COMMD6   | CLEC14A | TUBA1C    | PNISR      |
| 21 | MLLT11   | RPL34    | MT-ND4  | CKS1B     | SPTBN1     |
| 22 | UROD     | RPL26    | ENG     | AURKB     | CLEC14A    |
| 23 | ENO1     | RPS4X    | EFEMP1  | UBE2S     | LAMB1      |
| 24 | FKBP3    | RPS8     | CKAP4   | DLGAP5    | THBS1      |
| 25 | SRGN     | RPS15A   | MT-ND3  | CDC20     | NRP2       |
| 26 | MYL12B   | RPL39    | SLC3A2  | UBE2T     | CDH5       |
| 27 | S100A11  | RPS26    | SLC7A11 | TUBA1B    | UTRN       |
| 28 | EFHD2    | SELENOW  | PRSS23  | HIST1H4E  | MYH9       |
| 29 | VPS29    | RPL15    | CLDN11  | SMC4      | MMRN1      |
| 30 | SDCBP    | OST4     | FLNB    | H2AFZ     | GABPB1-AS1 |
| 31 | DKK1     | RPS14    | NR2F2   | H2AFX     | RSRP1      |
| 32 | VEPH1    | ZFAS1    | MACF1   | TYMS      | HLA-B      |
| 33 | TAF10    | CCDC85B  | AKAP12  | PTTG1     | KIAA1551   |
| 34 | UCHL3    | RPS3A    | MMRN1   | BIRC5     | LUC7L3     |
| 35 | NDUFA3   | RPL37    | APP     | G0S2      | RNF213     |
| 36 | MYL6     | RPL30    | MCAM    | PCLAF     | PLK2       |
| 37 | NDUFB6   | GUK1     | HMOX1   | HMG2      | DLL4       |
| 38 | IL1RL1   | RPL32    | ITGA5   | STMN1     | SOX4       |
| 39 | NDUFAF2  | RPL22    | CD59    | HMGB1     | APP        |
| 40 | CTNNA1   | RPS19    | MT-ND2  | RANBP1    | RGCC       |

**Supp Table 4** Top 40 differentially expressed genes for each EC cluster, ordered by fold change over all other clusters (as determined by Seurat). Top 10 differentially genes for each cluster are shown in Fig. 4E.

| #  | OSC-1    | OSC-2    | OSC-3    | OSC-4    | OSC-5    | OSC-6   | OSC-7    | OSC-8    |
|----|----------|----------|----------|----------|----------|---------|----------|----------|
| 1  | CCND1    | CLU      | SUSD2    | TIMP1    | AREG     | IGFBP2  | CENPF    | COL3A1   |
| 2  | ANP32B   | MT1X     | APOE     | IGFBP3   | CXCL1    | PTX3    | CKS2     | COL1A1   |
| 3  | DYNC1L12 | ADIRF    | COL4A1   | TGFBI    | CXCL8    | CFD     | PTTG1    | COL1A2   |
| 4  | MAP4     | DCN      | S100A4   | MT3      | SERPINE1 | FN1     | UBE2S    | IGFBP7   |
| 5  | HNRNPA1  | GLUL     | NDUFA4L2 | LOX      | ANGPTL4  | PLAT    | HMGB2    | C7       |
| 6  | MAP1B    | CD9      | CRYAB    | COL1A1   | PAPPA    | COL6A3  | TOP2A    | MGP      |
| 7  | S100A11  | ADH1B    | COL4A2   | CTGF     | GDF15    | DUSP23  | CCNB1    | COL5A2   |
| 8  | SH3BGRL3 | MT1E     | BGN      | GLRX     | HSPA5    | RPS26   | ASPM     | FBN1     |
| 9  | NPM1     | SFRP1    | CCL2     | CTHRC1   | RALA     | COL8A1  | UBE2C    | PAPPA    |
| 10 | PTPN11   | CAMK2N1  | TAGLN    | LMCD1    | GREM1    | STC2    | HIST1H4C | COL6A3   |
| 11 | ZEB1     | ID1      | ID3      | F3       | SOD2     | CCDC68  | TPX2     | CXCL2    |
| 12 | UACA     | ADAMTS1  | COL6A3   | FBXO32   | INHBA    | GAS6    | H2AFZ    | COL6A1   |
| 13 | SET      | DUSP1    | COL6A1   | COL3A1   | HMG2A    | LEPR    | CKAP2    | NDUFA4L2 |
| 14 | MAP4K4   | PHLDA1   | NR4A1    | CCDC80   | SLC16A3  | SRGN    | STMN1    | COL5A1   |
| 15 | KIF1C    | C1S      | XIST     | SPARC    | PDLIM4   | TXNIP   | CDKN3    | CXCL1    |
| 16 | PALLD    | MALAT1   | LY6K     | PLOD2    | P4HA2    | PLA2G16 | TUBB4B   | SPARC    |
| 17 | TCEAL4   | C1R      | CYR61    | SERPINE1 | MME      | CHST2   | MKI67    | COL6A2   |
| 18 | CFL1     | CCDC85B  | COL6A2   | IER3     | CDKN1A   | ITGBL1  | SMC4     | LOXL2    |
| 19 | FKBP1A   | PLIN2    | C11orf96 | COL1A2   | CXCL2    | PIP     | NUSAP1   | COL11A1  |
| 20 | C12orf75 | CEBPD    | HLA-DRB1 | COL5A1   | HILPDA   | DSEL    | CENPE    | CXCL3    |
| 21 | MYL9     | TBX3     | TNC      | NNMT     | PLOD2    | STMN2   | CKS1B    | CTGF     |
| 22 | PFN1     | MT1G     | ACTA2    | GREM1    | SPON2    | WNT5B   | ARL6IP1  | HTRA1    |
| 23 | PPIA     | NFKBIA   | LOXL2    | CTSC     | VCAN     | CCPG1   | HMMR     | PCOLCE   |
| 24 | HSP90AA1 | SELENOP  | JUNB     | THBS1    | G0S2     | CPM     | BIRC5    | COL4A1   |
| 25 | MYL12A   | IGFBP6   | EMP1     | POSTN    | UCHL1    | THBS1   | TUBA1C   | C11orf96 |
| 26 | OAZ1     | SPON2    | COL8A1   | HSD17B1  | NDRG1    | NPR3    | KPNA2    | CRLF1    |
| 27 | MYL12B   | MT1M     | EPS8     | CCL20    | UGCG     | TFPI    | KIF20B   | SRGN     |
| 28 | TFPI2    | TXNIP    | PDGFRB   | HLA-B    | PLAUR    | LEPROT  | TUBA1B   | EFEMP1   |
| 29 | YBX1     | SRPX     | FOS      | INHBA    | ERO1A    | NUPR1   | CCNB2    | MT-CO1   |
| 30 | PTMS     | GPX3     | MT1M     | TPM1     | MEG3     | RTN4    | CDK1     | GSTT2B   |
| 31 | NCL      | CTSK     | SCUBE3   | TFPI2    | CCL20    | DKK1    | CDC20    | ID3      |
| 32 | TMSB4X   | LGALS3   | SERPINF1 | HSD11B1  | METRNL   | GALNT15 | ANLN     | COL5A3   |
| 33 | ATP5F1E  | PDE5A    | NID1     | FKBP11   | DCBLD2   | TRIB3   | DLGAP5   | SERPINH1 |
| 34 | CYCS     | TBX2-AS1 | NOTCH3   | SAT1     | TNFAIP6  | DNAJC15 | AURKA    | POSTN    |
| 35 | TPM4     | NR2F1    | TINAGL1  | RGCC     | CALR     | EPSTI1  | HMGB1    | ACTA2    |
| 36 | EIF5B    | CKB      | NR2F2    | HIF1A    | FAM162A  | NETO2   | MAD2L1   | MT-CYB   |
| 37 | RPL22L1  | F2R      | MALAT1   | LDHA     | VEGFA    | HTRA1   | BUB3     | HGF      |
| 38 | HNRNPA3  | CXCL3    | LAMC1    | RECK     | CXCL6    | GADD45A | SGO2     | COL7A1   |
| 39 | TPM2     | NEAT1    | ID1      | KDELRL3  | HIF1A    | SLC3A2  | JPT1     | CXCL8    |
| 40 | TPM3     | PTN      | HTRA1    | KDELRL2  | KRT18    | LMO7    | CENPF    | THBS2    |

**Supp Table 5** Top 40 differentially expressed genes for each OSC cluster, ordered by fold change over all other clusters (as determined by Seurat).

| #  | ECFC Monolayer | Skin 3D <i>in vitro</i> microvessel network ECs | Skin <i>in vivo</i> ECs |
|----|----------------|-------------------------------------------------|-------------------------|
| 1  | <i>MT2A</i>    | <i>PHGDH</i>                                    | <i>CD74</i>             |
| 2  | <i>LGALS1</i>  | <i>TAGLN</i>                                    | <i>ZFP36</i>            |
| 3  | <i>VIM</i>     | <i>DDX10</i>                                    | <i>HLA-DRA</i>          |
| 4  | <i>RPLP1</i>   | <i>MPZL2</i>                                    | <i>GNB2L1</i>           |
| 5  | <i>TMSB10</i>  | <i>COL1A1</i>                                   | <i>DARC</i>             |
| 6  | <i>EEF1A1</i>  |                                                 | <i>SPARCL1</i>          |
| 7  | <i>FTL</i>     |                                                 | <i>SOD2</i>             |
| 8  | <i>S100A6</i>  |                                                 | <i>KRT14</i>            |
| 9  | <i>GAPDH</i>   |                                                 | <i>JUNB</i>             |
| 10 | <i>RPS2</i>    |                                                 | <i>SOCS3</i>            |
| 11 | <i>RPL10</i>   |                                                 | <i>HLA-DRB1</i>         |
| 12 | <i>RPS12</i>   |                                                 | <i>AQP1</i>             |
| 13 | <i>RPS18</i>   |                                                 | <i>FOS</i>              |
| 14 | <i>RPL13</i>   |                                                 | <i>NFKBIA</i>           |
| 15 | <i>RPL41</i>   |                                                 | <i>S100A4</i>           |
| 16 | <i>RPS3</i>    |                                                 | <i>SPRY1</i>            |
| 17 | <i>FTH1</i>    |                                                 | <i>SELE</i>             |
| 18 | <i>RPS19</i>   |                                                 | <i>RGS16</i>            |
| 19 | <i>MT-CO2</i>  |                                                 | <i>IL6</i>              |
| 20 | <i>MALAT1</i>  |                                                 | <i>CXCL2</i>            |

**Supp Table 6** Top 10 differentially expressed genes for each culture condition from the Skin EC comparisons (Fig. 6A), ordered by fold change over all other clusters (as determined by Seurat). Only 5 genes were determined to be differentially expressed between the Skin 3D *in vitro* microvessel network ECs compared to all other cells.

| #  | ECFC Monolayer  | Heart 3D <i>in vitro</i> microvessel network ECs | Heart <i>in vivo</i> ECs |
|----|-----------------|--------------------------------------------------|--------------------------|
| 1  | <i>THBS1</i>    | <i>RPS2</i>                                      | <i>MT-RNR2</i>           |
| 2  | <i>APLN</i>     | <i>RPLP0</i>                                     | <i>SPARCL1</i>           |
| 3  | <i>HHIP</i>     | <i>RPL13A</i>                                    | <i>FABP4</i>             |
| 4  | <i>MCAM</i>     | <i>RPS6</i>                                      | <i>TIMP3</i>             |
| 5  | <i>CYR61</i>    | <i>RPL3</i>                                      | <i>MT-RNR1</i>           |
| 6  | <i>KRT7</i>     | <i>RPL12</i>                                     | <i>TXNIP</i>             |
| 7  | <i>CTGF</i>     | <i>RPL15</i>                                     | <i>H19</i>               |
| 8  | <i>CD99</i>     | <i>RPL6</i>                                      | <i>VWF</i>               |
| 9  | <i>SERPINE1</i> | <i>RPL23A</i>                                    | <i>CD36</i>              |
| 10 | <i>PLAT</i>     | <i>RPL5</i>                                      | <i>CD74</i>              |
| 11 | <i>PTX3</i>     | <i>RPS13</i>                                     | <i>MYL7</i>              |
| 12 | <i>PPP1R14B</i> | <i>RPL27A</i>                                    | <i>F8</i>                |
| 13 | <i>TUBA1C</i>   | <i>RPL7</i>                                      | <i>ID1</i>               |
| 14 | <i>AKAP12</i>   | <i>RPL31</i>                                     | <i>MTATP6P1</i>          |
| 15 | <i>RALA</i>     | <i>SLC25A6</i>                                   | <i>A2M</i>               |
| 16 | <i>HMGA1</i>    | <i>COL1A1</i>                                    | <i>ACTC1</i>             |
| 17 | <i>MT2A</i>     | <i>RPL22L1</i>                                   | <i>STOM</i>              |
| 18 | <i>ANKRD1</i>   | <i>TKT</i>                                       | <i>FLT1</i>              |
| 19 | <i>CCND1</i>    | <i>NNMT</i>                                      | <i>FCN3</i>              |
| 20 | <i>EDN1</i>     | <i>RPL17</i>                                     | <i>AQP1</i>              |

**Supp Table 7** Top 10 differentially expressed genes for each culture condition from the Heart EC comparisons (Fig. 6B), ordered by fold change over all other clusters (as determined by Seurat).

| #  | ECFC Monolayer  | Lung 3D <i>in vitro</i> microvessel network ECs | Lung <i>in vivo</i> ECs |
|----|-----------------|-------------------------------------------------|-------------------------|
| 1  | <i>AKAP12</i>   | <i>FTL</i>                                      | <i>TIMP3</i>            |
| 2  | <i>KRT7</i>     | <i>GAPDH</i>                                    | <i>GALNT18</i>          |
| 3  | <i>TUBA1A</i>   | <i>RPLP0</i>                                    | <i>AC073861.1</i>       |
| 4  | <i>APLN</i>     | <i>RPL12</i>                                    | <i>SPARCL1</i>          |
| 5  | <i>HHIP</i>     | <i>FTH1</i>                                     | <i>PTPRM</i>            |
| 6  | <i>THBS1</i>    | <i>TPT1</i>                                     | <i>KIAA1217</i>         |
| 7  | <i>TUBA1B</i>   | <i>RPL17</i>                                    | <i>AQP1</i>             |
| 8  | <i>JPT1</i>     | <i>DCN</i>                                      | <i>PRKG1</i>            |
| 9  | <i>NES</i>      | <i>TIMP1</i>                                    | <i>AFF3</i>             |
| 10 | <i>ANPEP</i>    | <i>TXN</i>                                      | <i>RALGAPA2</i>         |
| 11 | <i>TUBB4B</i>   | <i>IFITM2</i>                                   | <i>MT-RNR2</i>          |
| 12 | <i>MT-CO2</i>   | <i>TKT</i>                                      | <i>SLCO2A1</i>          |
| 13 | <i>MT2A</i>     | <i>GLRX</i>                                     | <i>PTPRG</i>            |
| 14 | <i>MCAM</i>     | <i>RAB13</i>                                    | <i>LDB2</i>             |
| 15 | <i>MT-ND3</i>   | <i>RPS4Y1</i>                                   | <i>ADGRL2</i>           |
| 16 | <i>ANKRD1</i>   | <i>MIF</i>                                      | <i>CCL21</i>            |
| 17 | <i>TUBA1C</i>   | <i>NQO1</i>                                     | <i>FCN3</i>             |
| 18 | <i>PLAT</i>     | <i>PTGR1</i>                                    | <i>HSPA1A</i>           |
| 19 | <i>TFPI2</i>    | <i>BNIP3</i>                                    | <i>EPAS1</i>            |
| 20 | <i>HIST1H4C</i> | <i>HMOX1</i>                                    | <i>MGP</i>              |

**Supp Table 8** Top 10 differentially expressed genes for each culture condition from the Lung EC comparisons (Fig. 6C), ordered by fold change over all other clusters (as determined by Seurat).

| #  | ECFC Monolayer  | nPancreas 3D <i>in vitro</i> microvessel network ECs | nPancreas <i>in vivo</i> ECs |
|----|-----------------|------------------------------------------------------|------------------------------|
| 1  | <i>AKAP12</i>   | <i>RPL12</i>                                         | <i>SPARCL1</i>               |
| 2  | <i>APLN</i>     | <i>RPS2</i>                                          | <i>MT-RNR2</i>               |
| 3  | <i>MCAM</i>     | <i>RPLP0</i>                                         | <i>TXNIP</i>                 |
| 4  | <i>HHIP</i>     | <i>RPS8</i>                                          | <i>MT-RNR1</i>               |
| 5  | <i>MAP1B</i>    | <i>GAPDH</i>                                         | <i>CLPS</i>                  |
| 6  | <i>CCND1</i>    | <i>RPS19</i>                                         | <i>PLVAP</i>                 |
| 7  | <i>ANKRD1</i>   | <i>ACTG1</i>                                         | <i>CD74</i>                  |
| 8  | <i>CD99</i>     | <i>RPS13</i>                                         | <i>ID1</i>                   |
| 9  | <i>CTGF</i>     | <i>RPL31</i>                                         | <i>PRSS1</i>                 |
| 10 | <i>THBS1</i>    | <i>RPS16</i>                                         | <i>HLA-B</i>                 |
| 11 | <i>PTX3</i>     | <i>SLC25A6</i>                                       | <i>FABP5</i>                 |
| 12 | <i>HMMGA1</i>   | <i>COL1A1</i>                                        | <i>PRSS2</i>                 |
| 13 | <i>KRT18</i>    | <i>COL1A2</i>                                        | <i>A2M</i>                   |
| 14 | <i>LGALS1</i>   | <i>SERPINE1</i>                                      | <i>TIMP3</i>                 |
| 15 | <i>TUBA1A</i>   | <i>TPM2</i>                                          | <i>REG1A</i>                 |
| 16 | <i>PPP1R14B</i> | <i>TIMP1</i>                                         | <i>ITM2B</i>                 |
| 17 | <i>TUBA1C</i>   | <i>EIF4EBP1</i>                                      | <i>CD36</i>                  |
| 18 | <i>RALA</i>     | <i>EFEMP1</i>                                        | <i>GSN</i>                   |
| 19 | <i>TUBA1B</i>   | <i>FN1</i>                                           | <i>HLA-C</i>                 |
| 20 | <i>APLP2</i>    | <i>ZFAS1</i>                                         | <i>TGFBR2</i>                |

**Supp Table 9** Top 10 differentially expressed genes for each culture condition from the nPancreas EC comparisons (Fig. 6B), ordered by fold change over all other clusters (as determined by Seurat).



## References

1. THE TABULA SAPIENS CONSORTIUM (2022) The Tabula Sapiens: A multiple-organ, single-cell transcriptomic atlas of humans. *Science* 376:eabl4896. <https://doi.org/10.1126/science.abl4896>
2. Solé-Boldo L, Raddatz G, Schütz S, et al (2020) Single-cell transcriptomes of the human skin reveal age-related loss of fibroblast priming. *Communications Biology* 2020 3:1 3:1–12. <https://doi.org/10.1038/s42003-020-0922-4>
3. Schupp JC, Adams TS, Jr CC, et al (2021) Integrated Single-Cell Atlas of Endothelial Cells of the Human Lung. *Circulation* 144:286–302. <https://doi.org/10.1161/CIRCULATIONAHA.120.052318>
